# Supplementary material for: A new mathematical analysis of the probability of detection in cognitive radio over fading channels
Source: Springer Nature journal article supplement (doi:10.1186/1687-1499-2013-159), 2013-06-11

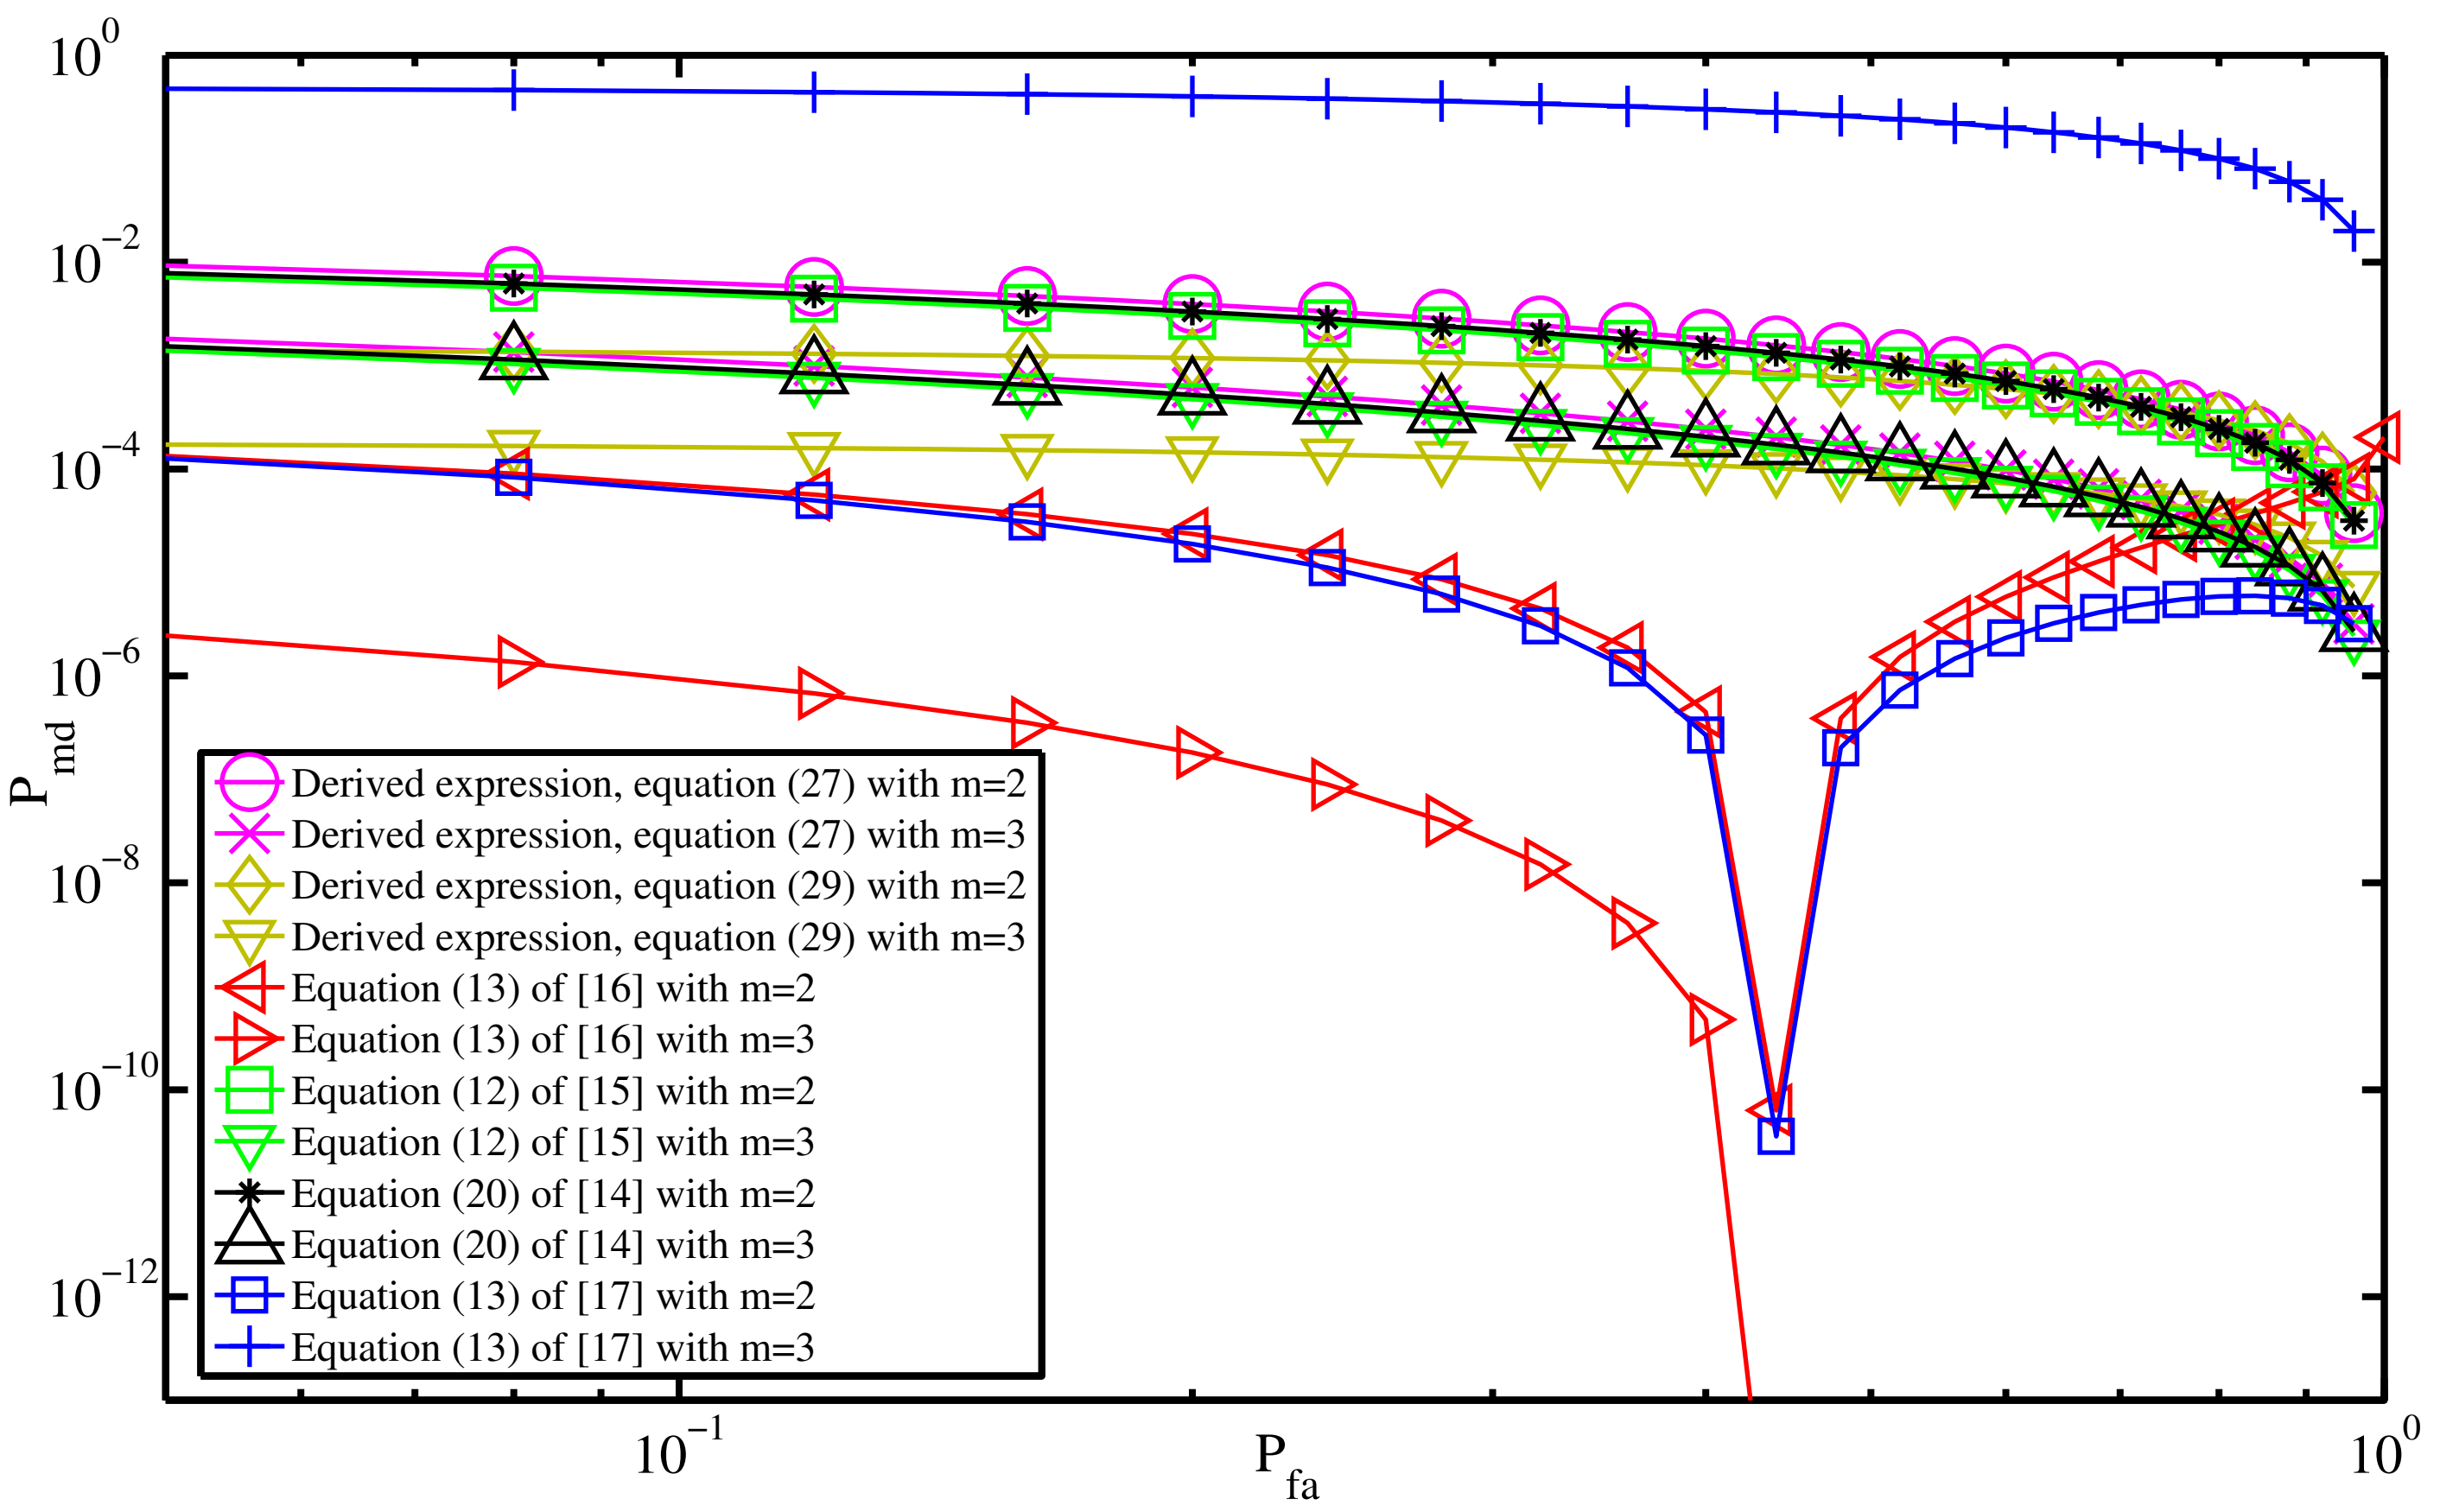

Supplement: 13638_2012_722_MOESM6_ESM.pdf [file 13638_2012_722_MOESM6_ESM.pdf]
